# Supplementary material for: Crystal packing of cubane and its nitryl-derivatives: a case of the discrete dependence of packing densities on substituent quantities
Source: Royal Society of Chemistry journal article supplement (doi:10.1039/c7ce00489c), 2017-01-01
Supplement: c7ce00489c1.pdf [file c7ce00489c1.pdf]

**Xudong He,<sup>ab†</sup> Xianfeng Wei,<sup>a†</sup> Yu Ma,<sup>a</sup> Zhipeng Lu,<sup>a</sup> and Chaoyang Zhang<sup>\*a</sup>**

<sup>a</sup>*Institute of Chemical Materials, China Academy of Engineering Physics (CAEP), P. O. Box 919-327, Mianyang, Sichuan 621900, China.*

<sup>b</sup>*Department of Chemistry, University of Science and Technology of China, Hefei 230026, China.*

## **Electronic Supplementary Information (ESI)**

### **Table of Contents**

- S1. Crystallographic information of cubane and nitrocubanes.**
- S2. Comparison in crystal packing of HexNC with disordered nitro O atoms attached to N7.**
- S3. Details of H···H, H···O and O···O interactions in crystals.**
- S4. Details of C-C and C-N bond length in crystallized and isolated cubane and nitrocubanes.**
- S5. References.**

## S1. Crystallographic information of cubane and nitrocubanes.

**Table s1.** Crystallographic information of cubane and nitrocubanes.

| Explosives                   | Cubane <sup>[1]</sup>         | MNC <sup>[2]</sup>                                          | BNC <sup>[3]</sup>                                          | TrNC <sup>[4]</sup>                                         | TeNC <sup>[4]</sup>                                         | PNC <sup>[5]</sup>                                           | HexNC <sup>[6]</sup>                                         | HepNC <sup>[7]</sup>                                         | ONC <sup>[7]</sup>                            |
|------------------------------|-------------------------------|-------------------------------------------------------------|-------------------------------------------------------------|-------------------------------------------------------------|-------------------------------------------------------------|--------------------------------------------------------------|--------------------------------------------------------------|--------------------------------------------------------------|-----------------------------------------------|
| Refcode                      | CUBANE                        | TAHME                                                       | CEDZUG                                                      | HASHAK                                                      | HASHEO                                                      | NACXEU                                                       | UGUGUY                                                       | CUGCOW                                                       | CUGDIR                                        |
| Formula                      | C <sub>8</sub> H <sub>8</sub> | C <sub>8</sub> H <sub>7</sub> N <sub>1</sub> O <sub>2</sub> | C <sub>8</sub> H <sub>6</sub> N <sub>2</sub> O <sub>4</sub> | C <sub>8</sub> H <sub>5</sub> N <sub>3</sub> O <sub>6</sub> | C <sub>8</sub> H <sub>4</sub> N <sub>4</sub> O <sub>8</sub> | C <sub>8</sub> H <sub>3</sub> N <sub>5</sub> O <sub>10</sub> | C <sub>8</sub> H <sub>2</sub> N <sub>6</sub> O <sub>12</sub> | C <sub>8</sub> H <sub>1</sub> N <sub>7</sub> O <sub>14</sub> | C <sub>8</sub> N <sub>8</sub> O <sub>16</sub> |
| Space group                  | R-3r                          | Pnma                                                        | P21/c                                                       | Pbca                                                        | P21/a                                                       | P21/c                                                        | Pnma                                                         | Pbcn                                                         | C2/c                                          |
| a(Å)                         | 5.340                         | 17.507(5)                                                   | 5.482(<1)                                                   | 11.656(2)                                                   | 12.255(2)                                                   | 6.637(3)                                                     | 13.936(2)                                                    | 23.594(1)                                                    | 12.785(<1)                                    |
| b(Å)                         | 5.340                         | 6.584(2)                                                    | 6.258(<1)                                                   | 11.946(2)                                                   | 7.007(1)                                                    | 23.275(14)                                                   | 10.887(1)                                                    | 8.174(<1)                                                    | 8.840(<1)                                     |
| c(Å)                         | 5.340                         | 5.832(2)                                                    | 11.581(<1)                                                  | 13.130(2)                                                   | 13.346(2)                                                   | 7.860(5)                                                     | 8.483(1)                                                     | 14.264(<1)                                                   | 13.924(<1)                                    |
| α(°)                         | 72.25                         | 90                                                          | 90                                                          | 90                                                          | 90                                                          | 90                                                           | 90                                                           | 90                                                           | 90                                            |
| β(°)                         | 72.25                         | 90                                                          | 102.38(1)                                                   | 90                                                          | 114.78(<1)                                                  | 113.21(5)                                                    | 90                                                           | 90                                                           | 98.03(<1)                                     |
| γ(°)                         | 72.25                         | 90                                                          | 90                                                          | 90                                                          | 90                                                          | 90                                                           | 90                                                           | 90                                                           | 90                                            |
| V(Å <sup>3</sup> )           | 134.298                       | 672.232                                                     | 388.004                                                     | 1828.255                                                    | 1040.569                                                    | 1115.915                                                     | 1287.097                                                     | 2750.811                                                     | 1558.173                                      |
| Z                            | 1                             | 4                                                           | 2                                                           | 8                                                           | 4                                                           | 4                                                            | 4                                                            | 8                                                            | 4                                             |
| Density (g/cm <sup>3</sup> ) | 1.288                         | 1.474                                                       | 1.662                                                       | 1.738                                                       | 1.814                                                       | 1.959                                                        | 1.931                                                        | 2.024                                                        | 1.978                                         |
| decomposition temperature    | >200 °C                       |                                                             | 260 °C                                                      | 250 °C                                                      | 270 °C                                                      | >250 °C                                                      |                                                              | >200 °C                                                      | >200 °C                                       |

Note, apart from MNC, other information is of common conditions.

**S2. Comparison in crystal packing of HexNC with disordered nitro O atoms attached to N7.**

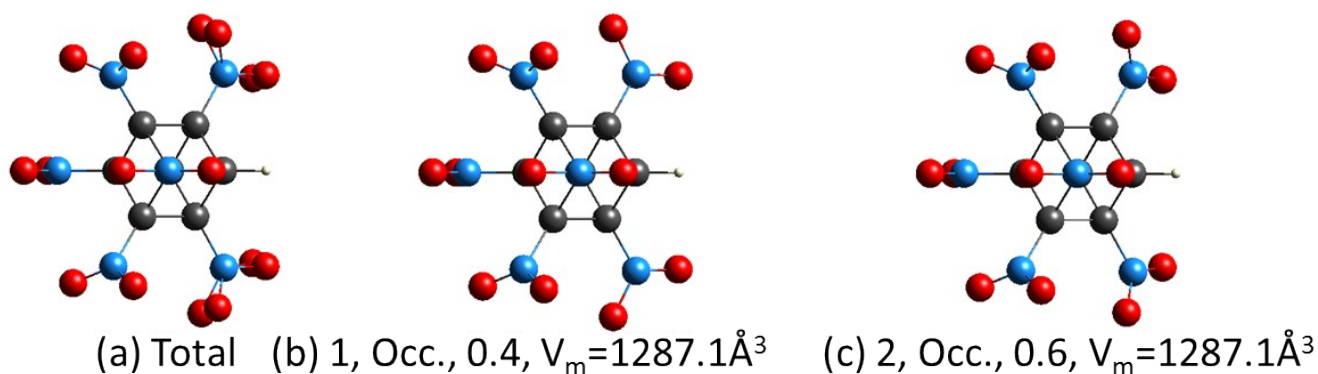

**Fig. s1** Molecular structures and  $V_m$  of HexNC in crystal.

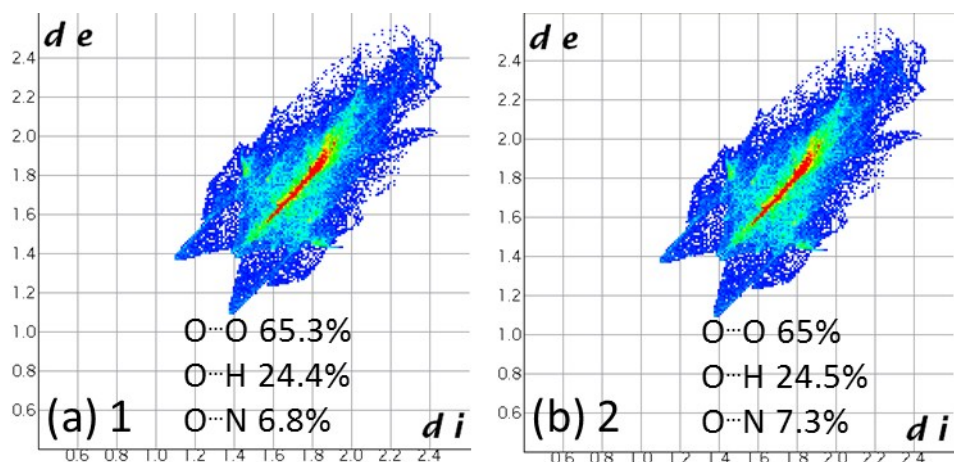

**Fig. s2** Two-dimensional fingerprint plots of interatomic contacts in HexNC with differently sited nitro O atoms.

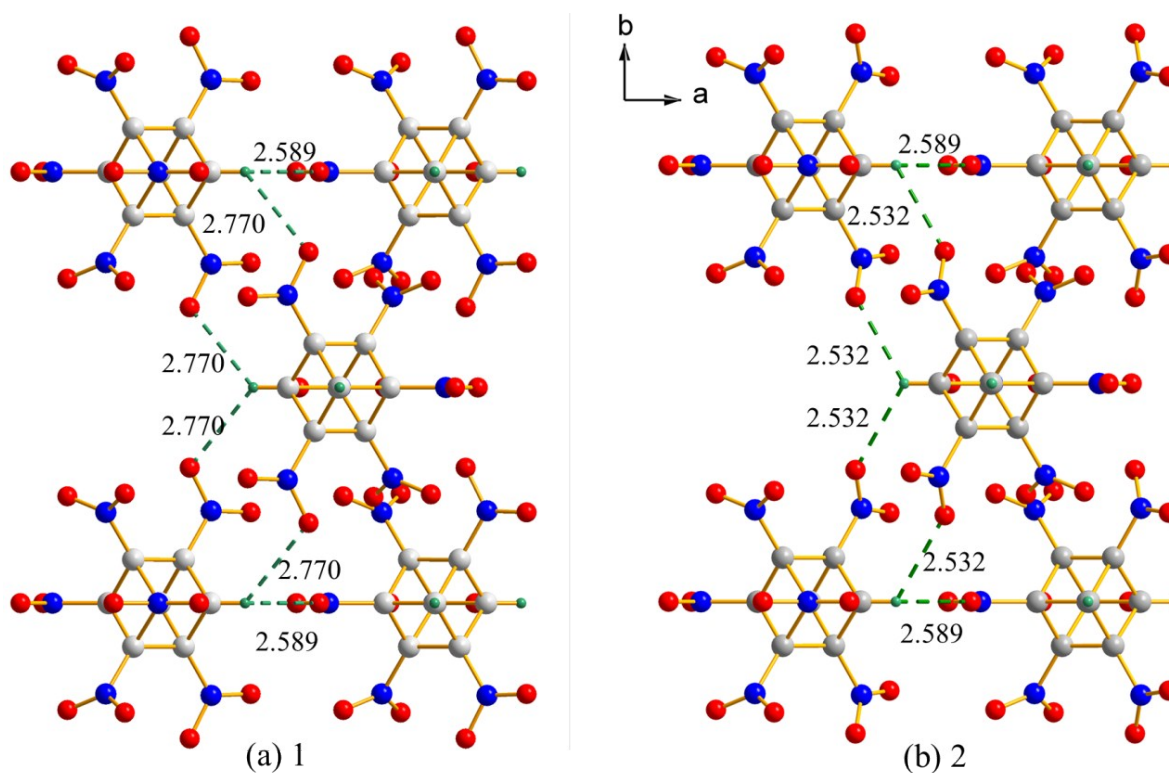

**Fig. s3** Comparison in intermolecular hydrogen bonds of HexNC with differently sited nitro O atoms.

The nitro O atoms on N7 atom of HexNC are disordered in an occupancy ratio of 0.6:0.4. To clarify the influence of this disorder on the PC and the intermolecular interactions in text, we first pay attention to both cases of the disorder separately. From above [Fig. s1](#), we can find that this disorder does not cause a difference in  $V_m$ , i.e.,  $V_m$  of both cases are same,  $1287 \text{ \AA}^3$ , calculated by a van de Waal radius method. Because of a same  $V_m$  and a same chemical molecule, PCs of the two cases are same as each other.

Next, we pay attention to the difference in close interatomic contacts between the two cases. As illustrated in [Fig. s2](#), the shapes and color distributions of the two-dimensional plots of the two cases are almost same too. And the largest difference in close contact distribution is only 0.5 %, suggesting a slight difference in intermolecular interactions.

Besides, we examine the distances of intermolecular hydrogen bonding between the two cases caused by the disorder. As demonstrated in [Fig. s3](#),  $0.238 \text{ \AA}$ , showing a rather large difference in the distance. However, because both  $2.532$  and  $2.770 \text{ \AA}$  show the weak hydrogen bonding, this rather large distance difference could not represent too much difference in interaction strength.

Overall, comparing the analyzing results of the two cases caused by the disorder of the nitro O atoms on N7 atom, we confirm there no difference in PC and a slight difference in intermolecular interactions. In text, only the case of the occupancy of 0.6 is described.

### S3. Details of H···H, H···O and O···O interactions in crystals.

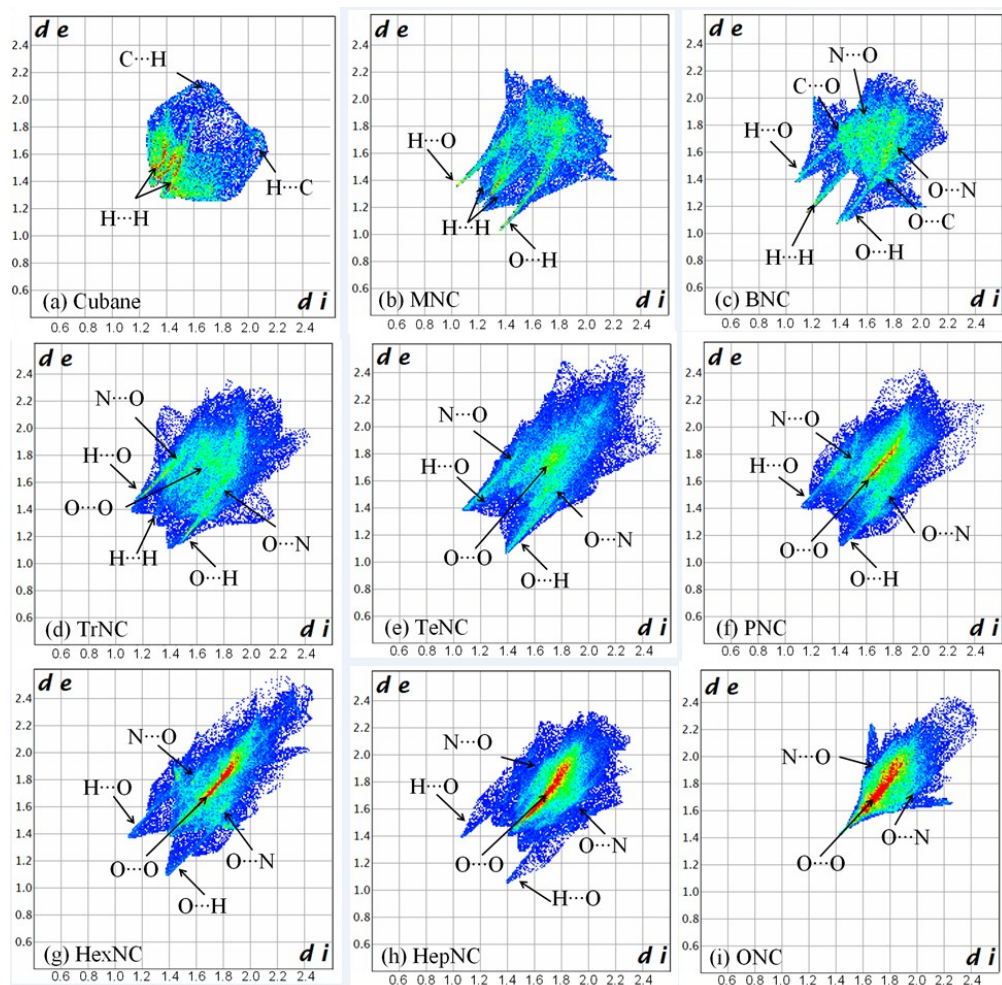

**Fig. S4** Two-dimensional fingerprint plots of interatomic contacts in cubane and its nitro-derivatives.

**Table S2.** Geometric analyses of the intermolecular H···H interactions in crystals.

| Molecule | atom1 | atom2 | Length, Å | Symmetry Operations                                                     |
|----------|-------|-------|-----------|-------------------------------------------------------------------------|
| Cubane   | H1    | H1A   | 2.73      | $-1+y,z,1+x;-1-x,-y,1-z;-1+z,1+x,y;-1-x,1-y,-z;-z,-1-x,1-y;y,-1+z,1+x;$ |
|          |       | H1C   |           | $-y,1-z,-1-x;z,1+x,-1+y;1+x,-1+y,z;1-z,-1-x,-y;1+x,y,-1+z;1-y,-z,-1-x;$ |
| MNC      | H1    | H1B   | 2.91      | $x,-1+y,z;x,1.5-y,z;$                                                   |
|          | H1    | H3    | 2.71      | $1-x,-1/2+y,-z;1-x,-y,-z;1-x,1-y,-z(2);$                                |
|          | H3    | H4    | 2.61      | $1-x,-1/2+y,1-z;1-x,-y,1-z;1-x,1-y,1-z(2);$                             |
|          | H4    | H4B   | 2.90      | $x,-1+y,z;x,1.5-y,z;$                                                   |
| BNC      | H2    | H3    | 2.48      | $x,-1+y,z;-x,-1-y,1-z;x,1+y,z;-x,1-y,1-z;$                              |
| TrNC     | H1    | H4    | 2.78      | $x,1/2-y,1/2+z;x,1/2-y,-1/2+z;$                                         |

**Table s3. Geometric analyses of the intermolecular HBs in crystals.**

| Molecule | D  | H  | A   | D-H, Å | H...A, Å | A...D, Å | A-H...D, ° | Symmetry Operation                        |
|----------|----|----|-----|--------|----------|----------|------------|-------------------------------------------|
| MNC      | C2 | H1 | O1  | 0.93   | 2.52     | 3.41     | 161.3      | 1/2-x,-1/2+y,1/2-z; 1/2-x,-1-y,1/2+z;     |
|          | C6 | H5 | O2  | 0.87   | 2.58     | 3.54     | 177.3      | 1/2-x,1/2+y,-1/2-z; 1/2-x,-1/2+y,-1/2+z;  |
| BNC      | C3 | H2 | O1  | 0.96   | 2.53     | 3.32     | 139.6      | x,y,-1+z; x,y,1+z;                        |
|          | C3 | H2 | O1  | 0.96   | 2.53     | 3.32     | 139.6      | -1+x,-1/2-y,-1/2+z; -1+x,1/2-y,-1/2+z;    |
| TrNC     | C1 | H1 | O1  | 0.92   | 2.56     | 3.01     | 110.4      | 1-x,-1/2+y,1.5-z; 1-x,1/2+y,1.5-z;        |
|          | C8 | H5 | O6  | 0.94   | 2.55     | 3.11     | 118.3      | -x,1/2+y,1/2-z; -x,-1/2+y,1/2-z;          |
|          | C4 | H2 | O4  | 0.92   | 2.55     | 3.22     | 129.6      | -1/2+x,1/2-y,-z; 1/2+x,1/2-y,-z;          |
| TeNC     | C4 | H2 | O4  | 0.92   | 2.55     | 3.22     | 129.6      | -1/2+x,-1/2-y,z; 1/2+x,-1/2-y,z;          |
|          | C8 | H4 | O8  | 0.94   | 2.54     | 3.16     | 123.7      | -1/2+x,-1/2-y,z; 1/2+x,-1/2-y,z;          |
| PNC      | C4 | H2 | O5  | 0.92   | 2.55     | 3.29     | 137.7      | 1/2-x,-1/2+y,-z; 1/2-x,1/2+y,-z;          |
|          | C8 | H3 | O1  | 0.95   | 2.59     | 3.12     | 115.3      | 1-x,1-y,1-z,(2);                          |
|          | C8 | H3 | O10 | 0.95   | 2.59     | 3.25     | 126.6      | -x,1-y,-z,(2);                            |
| HexNC    | C6 | H2 | O5  | 0.92   | 2.59     | 3.15     | 119.5      | -1/2+x,y,1.5-z; 1/2+x,y,1.5-z;            |
|          | C6 | H2 | O8  | 0.92   | 2.53     | 3.11     | 121.4      | 1-x,-y,2-z,(2); 1-x,1/2+y,2-z; 1-x,1-y,2- |
| HepNC    | C8 | H1 | O9  | 0.98   | 2.53     | 3.49     | 116.5      | z;                                        |
|          | C8 | H1 | O9  | 0.98   | 2.53     | 3.49     | 116.5      | x,-1+y,z; x,1+y,z;                        |

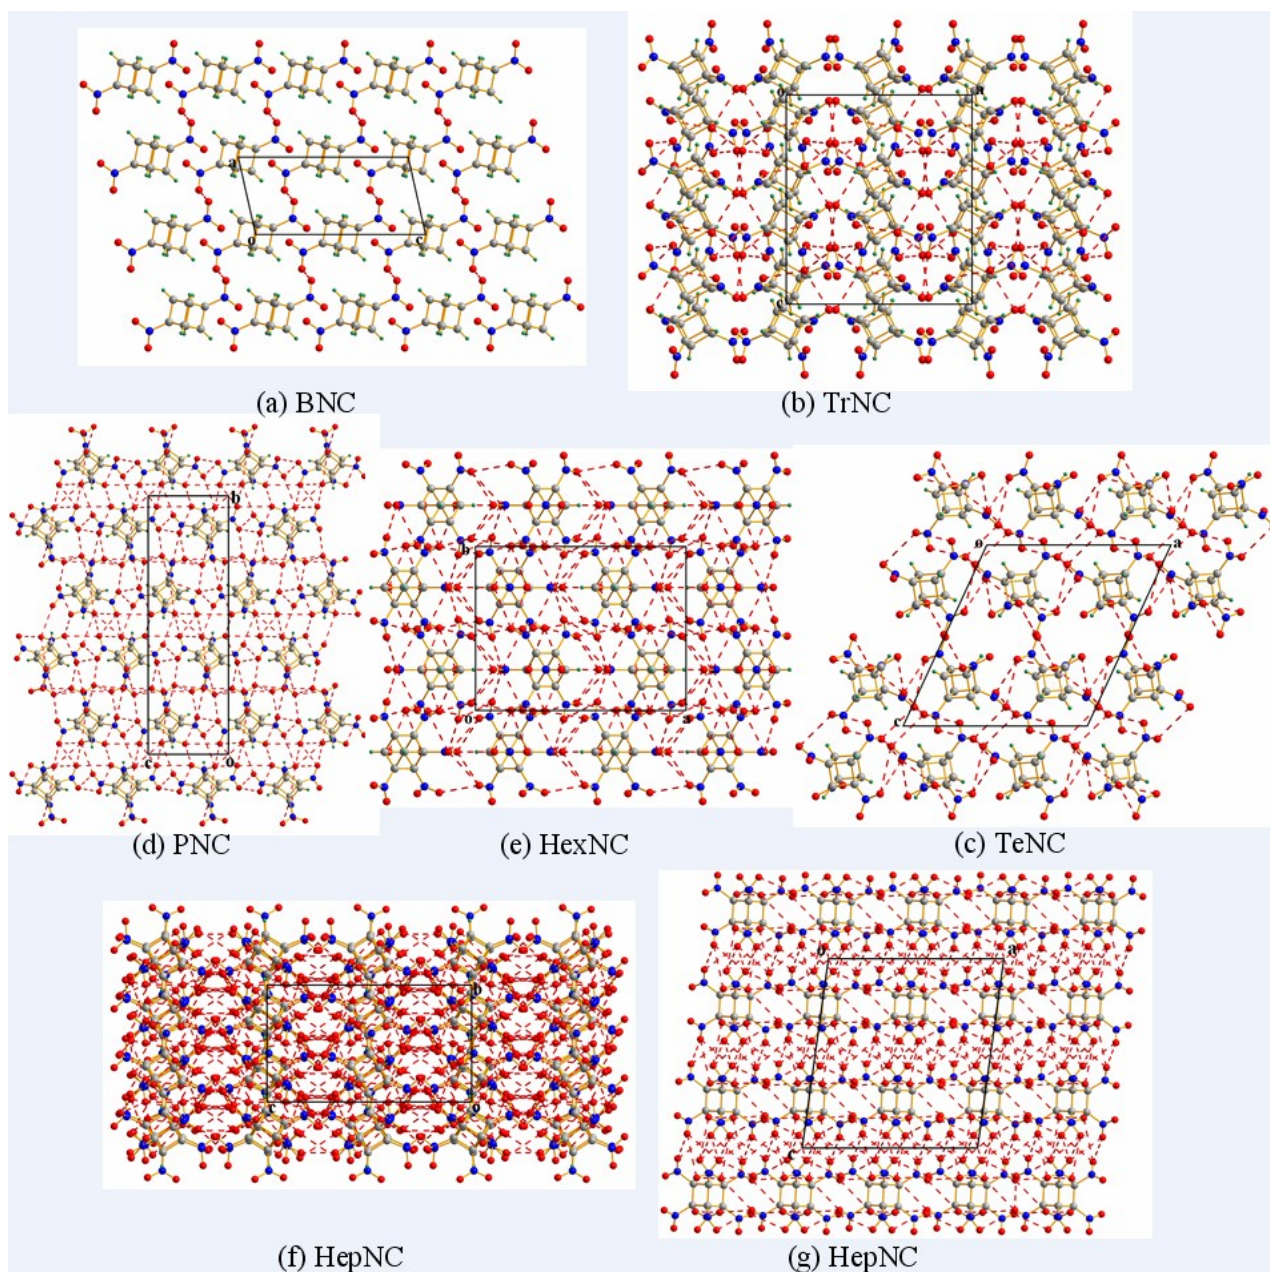

**Fig. s5** O...O contacts in nitrocubanes represented by red dashes.

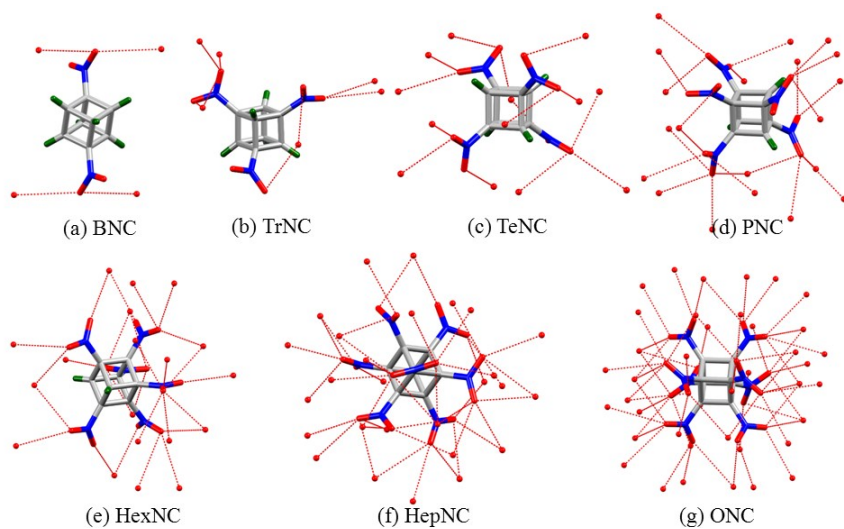

**Fig. s6** O...O contacts around one molecule in nitrocubanes represented by red lines.

**Table s4. Geometric analyses of the intermolecular O...O interactions in crystals.**

| Molecule | atom1 | atom2 | Length, Å  | Symmetry Operations                                                         |
|----------|-------|-------|------------|-----------------------------------------------------------------------------|
| BNC      | O1B   | O1B   | 3.292      | -1+x,-1/2-y,-1/2+z,(2);                                                     |
|          | O1    | O1    | 3.292      | 1-x,-1/2+y,1.5-z,(2);                                                       |
| TrNC     | O2    | O3    | 2.993      | -x,1/2+y,1/2-z; -x,-1/2+y,1/2-z;                                            |
|          | O2    | O4    | 2.941      | x,1/2-y,1/2+z;x,1/2-y,-1/2+z;                                               |
| TeNC     | O2    | O5    | 3.201      | 1/2+x,y,1/2-z;-1/2+x,y,1/2-z;                                               |
|          | O1    | O3    | 2.957      | x,1+y,z; x,-1+y,z;                                                          |
|          | O3    | O8    | 2.946      | -1/2+x,-1/2-y,z; 1/2+x,-1/2-y,z;                                            |
|          | O4    | O6    | 2.998      | -1/2+x,-1/2-y,z; 1/2+x,1/2-y,z;                                             |
|          | O5    | O6    | 3.066      | 1/2-x,-1/2+y,-z; 1/2-x,1/2+y,-z;                                            |
| PNC      | O7    | O7    | 2.939      | 1-x,-y,1-z;                                                                 |
|          | O1    | O1    | 3.225      | 1-x,1-y,1-z;                                                                |
|          | O1    | O9    | 3.052      | 1-x,1-y,1-z,(2);                                                            |
|          | O1    | O10   | 3.149      | 1+x,y,1+z; -1+x,y,-1+z;                                                     |
|          | O2    | O5    | 3.244      | x,y,1+z; x, y,-1+z;                                                         |
|          | O2    | O6    | 3.257      | 1+x,y,1+z; -1+x,y,-1+z;                                                     |
|          | O2    | O7    | 3.036      | 1+x,1/2-y,1/2+z; -1+x,1/2-y,-1/2+z;                                         |
|          | O4    | O5    | 2.920      | x,1/2-y,1/2+z; x,1/2-y,-1/2+z;                                              |
|          | O4    | O7    | 3.127      | 1+x,1/2-y,1/2+z; -1+x,1/2-y,-1/2+z;                                         |
|          | O4    | O8    | 2.850      | x,1/2-y,1/2+z; x,1/2-y,-1/2+z;                                              |
|          | O5    | O8    | 2.884      | x,1/2-y,-1/2+z; x,1/2-y,1/2+z;                                              |
|          | O5    | O10   | 3.024      | 1+x,y,z; -1+x,y,z;                                                          |
|          | O6    | O9    | 3.245      | -x,1-y,-z,(2);                                                              |
|          | O7    | O8    | 2.749      | x,1/2-y,-1/2+z; x,1/2-y,1/2+z;                                              |
|          | O9    | O9    | 3.245      | -x,1-y,1-z;                                                                 |
| O10      | O10   | 2.982 | -x,1-y,-z; |                                                                             |
| HexNC    | O1    | O4    | 3.215      | 1/2-x,1/2+y,1/2+z; 1/2-x,-y,1/2+z; 1/2-x,-1/2+y,-1/2+z; 1/2-x,1/2+y,-1/2+z; |
|          | O1    | O6    | 3.094      | 1/2+x,y,2.5-z; -1/2+x,y,2.5-z;                                              |
|          | O2    | O4    | 3.242      | 1/2-x,1/2+y,1/2+z; 1/2-x,-y,1/2+z; 1/2-x,-1/2+y,-1/2+z; 1/2-x,1/2+y,-1/2+z; |
|          | O3    | O4B   | 2.766      | 1/2-x,-y,1/2+z; 1/2-x,1/2+y,1/2+z; 1/2-x,-y,-1/2+z; 1/2-x,1/2+y,-1/2+z;     |
|          | O3    | O5    | 3.014      | 1/2-x,-1/2+y,1/2+z; 1/2-x,-y,-1/2+z; 1/2-x,1/2+y,-1/2+z; 1/2-x,1/2+y,1/2+z; |
|          | O4    | O7    | 3.185      | -1/2+x,y,1.5-z; -1/2+x,1/2-y,1.5-z; 1/2+x,1/2-y,1.5-z; 1/2+x,y,1.5-z;       |
|          | O4    | O7B   | 2.915      | 1/2-x,-y,1/2+z; 1/2-x,1/2+y,1/2+z; 1/2-x,-y,-1/2+z; 1/2-x,1/2+y,-1/2+z;     |
|          | O5    | O7    | 3.119      | -1/2+x,y,1.5-z; -1/2+x,1/2-y,1.5-z; 1/2+x,y,1.5-z,(2);                      |
|          | O5    | O8    | 3.236      | 1/2-x,1/2+y,-1/2+z; 1/2-x,-1/2+y,1/2+z; 1/2-x,-y,-1/2+z; 1/2-x,1/2+y,1/2+z; |
|          | O6    | O7    | 2.958      | -1/2+x,y,1.5-z; -1/2+x,1/2-y,1.5-z; 1/2+x,y,1.5-z; 1/2+x,y,1.5-z;           |
| HepNC    | O8    | O8    | 2.876      | 1-x,-y,2-z; 1-x,1/2+y,2-z;                                                  |
|          | O1    | O2    | 2.967      | 1/2-x,-1/2+y,z,(2);                                                         |
|          | O1    | O3    | 3.236      | 1/2-x,1/2-y,-1/2+z; 1/2-x,1/2-y,1/2+z;                                      |
|          | O1    | O6    | 2.873      | x,1-y,1/2+z;x,1-y,-1/2+z;                                                   |
|          | O1    | O12   | 3.044      | 1/2-x,-1/2+y,z,(2);                                                         |



|     |     |     |       |                                                                                   |
|-----|-----|-----|-------|-----------------------------------------------------------------------------------|
|     | O2  | O9  | 3.005 | $1/2-x, -1/2+y, z, (2);$                                                          |
|     | O2  | O12 | 3.252 | $1/2-x, -1/2+y, z, (2);$                                                          |
|     | O3  | O4  | 3.048 | $1/2-x, -1/2+y, z, (2);$                                                          |
|     | O3  | O10 | 3.173 | $1/2-x, -1/2+y, z, (2);$                                                          |
|     | O3  | O12 | 3.121 | $1/2-x, 1/2-y, -1/2+z; 1/2-x, 1/2-y, 1/2+z;$                                      |
|     | O5  | O9  | 3.055 | $x, -y, 1/2+z, (2);$                                                              |
|     | O6  | O10 | 3.040 | $x, 1+y, z; x, -1+y, z;$                                                          |
|     | O6  | O13 | 3.037 | $x, 1-y, -1/2+z; x, 1-y, 1/2+z;$                                                  |
|     | O7  | O7  | 2.887 | $1-x, y, 1.5-z;$                                                                  |
|     | O7  | O9  | 3.124 | $1-x, -y, 1-z, (2);$                                                              |
|     | O7  | O13 | 2.846 | $1-x, 1-y, 1-z, (2);$                                                             |
|     | O8  | O8  | 2.790 | $1-x, -y, 1-z;$                                                                   |
|     | O8  | O11 | 3.146 | $x, -y, 1/2+z; x, -y, -1/2+z;$                                                    |
|     | O8  | O14 | 2.946 | $1-x, -y, 1-z, (2);$                                                              |
|     | O9  | O14 | 3.104 | $1-x, -y, 1-z, (2);$                                                              |
|     | O10 | O11 | 3.247 | $x, -y, 1/2+z; x, -y, -1/2+z;$                                                    |
|     | O10 | O12 | 3.030 | $x, -y, 1/2+z; x, -y, -1/2+z;$                                                    |
|     | O11 | O8  | 3.102 | $1-x, -y, 1-z, (2);$                                                              |
|     | O13 | O13 | 2.878 | $1-x, y, 1/2-z;$                                                                  |
|     | O14 | O14 | 2.977 | $1-x, 1-y, 1-z;$                                                                  |
| ONC | O1  | O3F | 3.251 | $1/2-x, 1/2+y, 1/2-z, (2); 1/2+x, -1/2+y, z; 1/2+x, 1/2+y, z;$                    |
|     | O1  | O4  | 3.178 | $-1/2+x, 1/2+y, z; 1/2-x, -1/2+y, 1/2-z; 1/2+x, -1/2+y, z; 1.5-x, 1/2+y, z;$      |
|     | O1  | O5F | 2.832 | $1/2-x, 1/2+y, 1/2-z; 1/2-x, -1/2+y, 1/2-z; 1/2+x, -1/2+y, z; 1/2+x, 1/2+y, z;$   |
|     | O1  | O7  | 3.161 | $-1/2+x, -1/2+y, z; 1/2-x, 1/2+y, 1/2-z; 1.5-x, -1/2+y, 1/2-z; 1/2+x, 1/2+y, z;$  |
|     | O2  | O2F | 3.154 | $1/2-x, 1/2-y, 1-z; 1/2+x, 1/2-y, -1/2+z$                                         |
|     | O2  | O6  | 3.261 | $x, 1-y, 1/2+z; 1-x, 1-y, 1-z; x, 1-y, -1/2+z; 1-x, 1-y, -z;$                     |
|     | O2  | O8F | 3.170 | $x, 1-y, -1/2+z, (2); 1-x, 1-y, 1-z, (2);$                                        |
|     | O3  | O4F | 3.274 | $1-x, -y, 1-z, (2); x, -y, -1/2+z, (2);$                                          |
|     | O3  | O5F | 3.132 | $1/2-x, -1/2+y, 1/2-z; 1/2+x, 1/2+y, z; 1/2-x, 1/2+y, 1/2-z; 1/2+x, -1/2+y, z$    |
|     | O3  | O7  | 3.140 | $x, -1+y, z, (2); -x, -1+y, 1/2-z; 1-x, 1-y, 1/2-z;$                              |
|     | O4  | O4F | 3.167 | $1-x, -y, 1-z; x, -y, -1/2+z;$                                                    |
|     | O4  | O6  | 3.082 | $-1/2+x, 1/2-y, -1/2+z; 1/2-x, 1/2-y, -z; 1/2+x, 1/2-y, 1/2+z; 1.5-x, 1/2-y, 1-z$ |
|     | O4  | O8F | 3.297 | $1-x, 1-y, 1-z, (2); x, 1-y, -1/2+z, (2);$                                        |
|     | O5  | O8F | 3.014 | $1/2-x, -1/2+y, 1/2-z; 1/2-x, 1/2+y, 1/2-z; 1/2+x, -1/2+y, z; 1/2+x, 1/2+y, z;$   |
|     | O6  | O8  | 3.002 | $x, 1-y, -1/2+z; 1-x, 1-y, -z; x, 1-y, 1/2+z; 1-x, 1-y, 1-z;$                     |
|     | O8  | O8F | 2.916 | $1-x, 1-y, 1-z; x, 1-y, -1/2+z;$                                                  |

#### **S4. Details of C-C and C-N bond length in crystallized and isolated cubane and nitrocubanes.**

Each of the discussed molecules can structurally be partitioned into cage and substituted nitro groups (hydrogen atoms saturate the cages, and a small length difference is found in all C-H bonds because no strong hydrogen bonding, HB, exists in these crystals). Therefore, the C-C bonds of the cages and the C-N bonds related with nitro groups should be focused on. Moreover, these molecular structures in the crystallized state should be compared with those relaxed in gaseous state to investigate the crystal effect. Given the large amount of these bonds, we will discuss these bonds by averaging or abstracting the maximal difference between the longest and shortest bonds of the same kind. We first focused on the average C-C bond length and the average C-N bond length in both crystallized and isolated states. With respect to the C-C bonds of crystallized cubane and nitrocubane molecules, they show a fluctuation in a range of 0.023 Å when the nitryl amount was increased. The shortest and longest average C-C bond lengths, 1.542 and 1.565 Å, appears in MNC and HexNC, respectively. In contrast to that of cubane, these average length of C-C bonds varies from -0.5 to 1.0 %. Considering the esds in [Table s1](#), these variations can be overlooked. Meanwhile, for molecules that are relaxed as isolated ones, the C-C bond length changes smoothly from an initial decrease and a subsequent increase when nitro groups are increased. These changes are slight and are within 0.009 Å only, which is less than that of crystallized state (0.023 Å). Moreover, as expected, the average C-C bond length of the crystallized state increases for each molecule after relaxation. In contrast to crystallized C-C bonds, crystallized C-N bonds vary smoothly in terms of their average length (i.e., increase first and decrease later), to an extent of 0.023 Å, as well. In the isolated molecules, the C-N bonds increase successively with increasing nitro groups from 1.458 Å to 1.478 Å. Surprisingly, these bonds shrunk after molecular relaxation, which may be attributed to the enlargement of cages by C-C bond relaxation. As a whole, for the C-C and C-N bonds in both crystallized

and isolated states, the average length varies in a small range with increasing nitro groups.

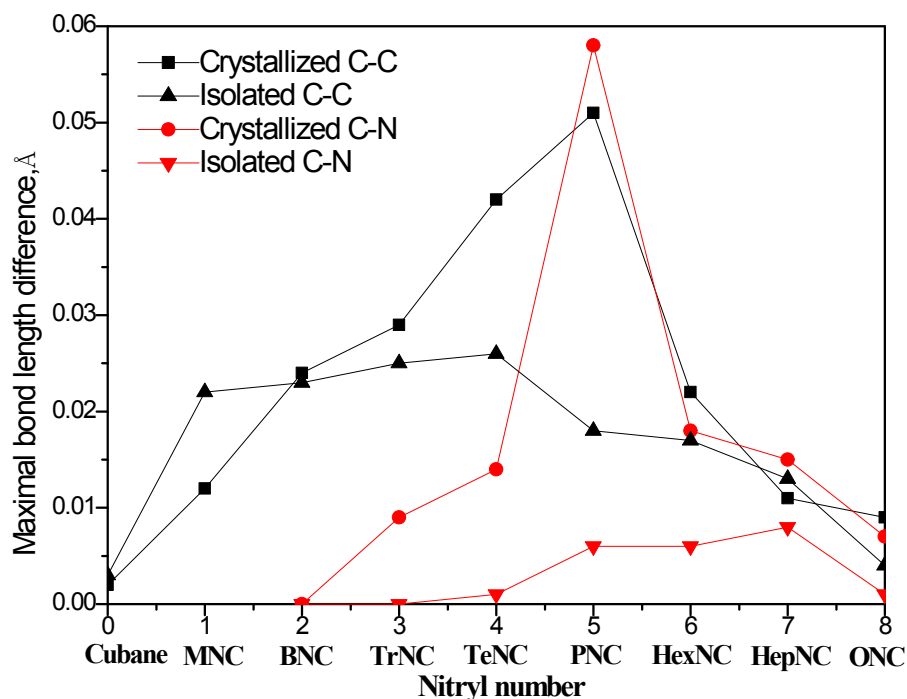

**Figure s7.** Maximal bond length differences of C-C and C-N of crystallized and isolated cubane and nitrocubanes.

However, after a careful examination of individual bonds, we find that much larger differences exist between the shortest and the longest bonds of both C-C and C-N in crystallized state relative to the isolated state, suggesting that crystal packing leads to multiple changes in molecular structures.

Figure s6 exhibits the largest length differences of C-C and C-N bonds in PNC, namely, 0.051 and 0.058 Å, respectively, which indicate the largest molecular distortion.

## S5. References.

- [1] Fleischer E. B. *J. Am. Chem. Soc.*, **1964**, 86, 3889.
- [2] Gilardi R.; Butcher R. J. *J. Chem. Cryst.*, **2003**, 33, 281.
- [3] Eaton P. E.; Ravi Shankar B. K.; Price G. D.; Pluth J. J.; Gilbert E. E.; Alster J.; Sandus O. *J. Org. Chem.*, **1984**, 49, 185.
- [4] Eaton P. E.; Xiong Y. S.; Gilardi R. *J. Am. Chem. Soc.*, **1993**, 115, 10195.
- [5] Lukin K. A.; Li J. C.; Eaton P. E.; Kanomata N.; Hain J.; Punzalan E.; Gilardi, R. *J. Am. Chem. Soc.*, **1997**, 119, 9591.
- [6] Gilardi, R.; Butcher R. J.; Zhang, M. X. *Acta Crystallogr., Sect. E: Struct. Rep. Online*, **2002**, 58, o978
- [7] Zhang, M. X.; Eaton, P. E.; Gilardi, R. *Angew. Chem. Int. Ed.*, **2000**, 39, 401.
